# Supplementary material for: A statistical approach for detecting genomic aberrations in heterogeneous tumor samples from single nucleotide polymorphism genotyping data
Source: Springer Nature journal article supplement (doi:10.1186/gb-2010-11-9-r92), 2010-09-21
Supplement: 13059_2010_2385_MOESM5_ESM.pdf [file 13059_2010_2385_MOESM5_ESM.pdf]

|            |                 | Proportion of sample | Cell Type | SNP      |           |            |                        |     |
|------------|-----------------|----------------------|-----------|----------|-----------|------------|------------------------|-----|
| <b>(a)</b> |                 |                      |           | 1        | 2         | 3          | 4                      | 5   |
|            |                 | 20%                  | Normal    | AA       | AB        | BB         | AB                     | AB  |
|            |                 | 30%                  | Clone 1   | A        | AB        | BB         | AABB                   | ABB |
|            |                 | 30%                  | Clone 2   | AA       | AB        | BBB        | AABB                   | AAB |
|            |                 | 20%                  | Clone 3   | AA       | B         | BBB        | AABB                   | AB  |
| <b>(b)</b> | Normal genotype |                      | AA (70%)  | AB (20%) | BB (50%)  | AB (20%)   | AB (40%)               |     |
|            | Tumour genotype |                      | A (30%)   | B (80%)  | BBB (50%) | AABB (80%) | AAB (30%) or ABB (30%) |     |
