# Supplementary material for: A statistical approach for detecting genomic aberrations in heterogeneous tumor samples from single nucleotide polymorphism genotyping data
Source: Springer Nature journal article supplement (doi:10.1186/gb-2010-11-9-r92), 2010-09-21

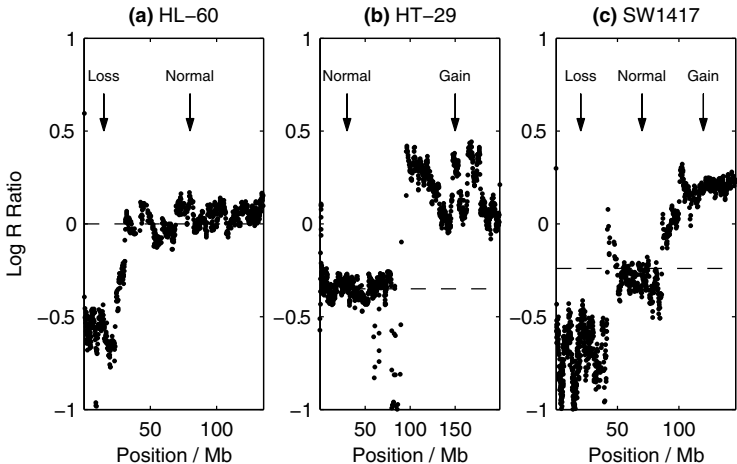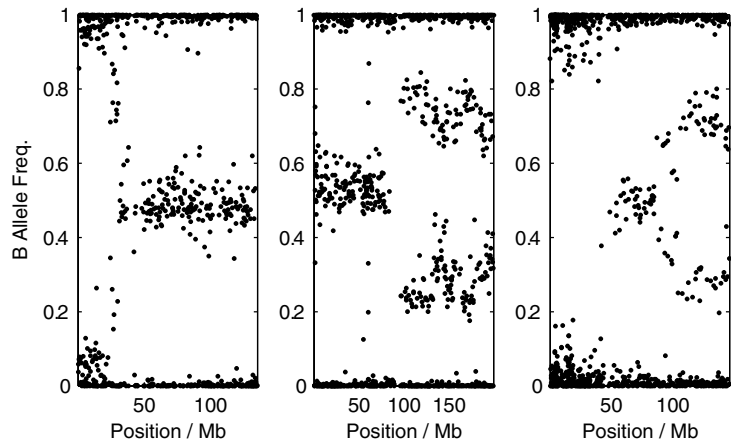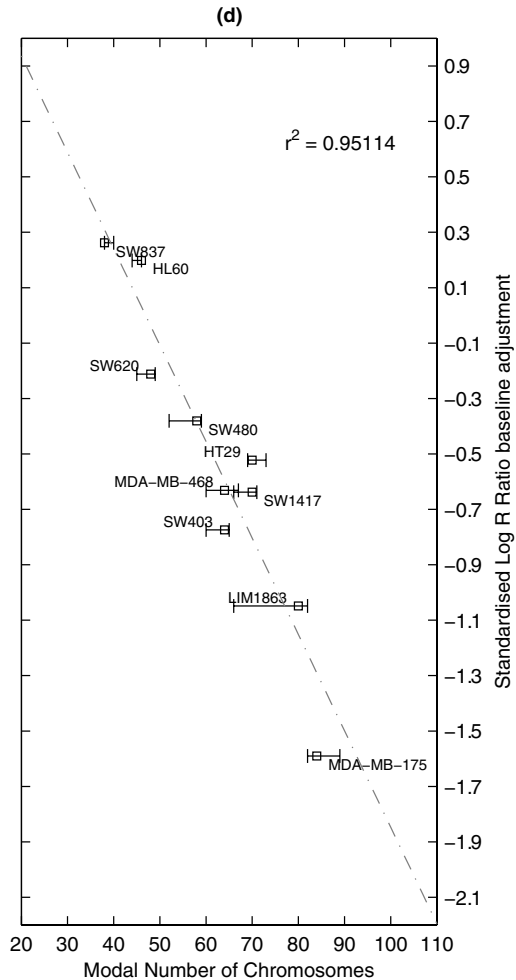

Supplement: 13059_2010_2385_MOESM6_ESM.pdf [file 13059_2010_2385_MOESM6_ESM.pdf]
